# Supplementary material for: The Isolation and Characterization of a Broad Host Range Bcep22-like Podovirus JC1
Source: MDPI journal article supplement (doi:10.3390/v14050938), 2022-04-29
Supplement: s1 [file s1]

# Supplementary Data

**Supplementary Table S1: Plasmids used in this study.**

| Plasmids       | Description                                                                           | Source                     |
|----------------|---------------------------------------------------------------------------------------|----------------------------|
| pSCRhaB2-Tc    | <i>Burkholderia cenocepacia</i> rhamnose-inducible expression vector, Tc <sup>R</sup> | (Juárez-Lara, unpublished) |
| pK56-2hldAhldD | pSCRha carrying K56-2 <i>hldA</i> and <i>hldD</i> , Tc <sup>R</sup>                   | This study                 |
| pK56-2waaC     | pSCRha carrying K56-2 <i>waaC</i> , Tc <sup>R</sup>                                   | This study                 |
| pK56-2waaL     | pSCRha carrying K56-2 <i>waaL</i> , Tc <sup>R</sup>                                   | This study                 |
| pK56-2wabO     | pSCRha carrying K56-2 <i>wabO</i> , Tc <sup>R</sup>                                   | This study                 |
| pK56-2wabR     | pSCRha carrying K56-2 <i>wabR</i> , Tc <sup>R</sup>                                   | This study                 |
| pK56-2wabS     | pSCRha carrying K56-2 <i>wabS</i> , Tc <sup>R</sup>                                   | This study                 |
| pK56-2wbxE     | pSCRha carrying K56-2 <i>wbxE</i> , Tc <sup>R</sup>                                   | This study                 |

**Supplementary Table S2: Primers used in this study.**

| Primer name  | Sequence (5'-3')                | Function                                                                                                                      |
|--------------|---------------------------------|-------------------------------------------------------------------------------------------------------------------------------|
| 2F           | CTGCTTCTTCGATAGTGGTG            | Anneals at 14,813 bp to 14,832 bp of JC1 genome, used to detect presence of JC1 genome in bacteria survivors of JC1 infection |
| 2R           | TCGGATTCTCCTTCTCG               | Anneals at 15,729 bp to 15,746 bp of JC1 genome, used to detect presence of JC1 genome in bacteria survivors of JC1 infection |
| attP_F       | TCACGAGCAGGCTATACACG            | Anneals at 1237 bp to 1256 bp. Flanks the predicted <i>attP</i> site upstream of <i>gpl</i> serine recombinase.               |
| attP_R       | TGCAGCGTACAGACAGTTCC            | Anneals at 1850 bp to 1869 bp. Flanks the predicted <i>attP</i> site upstream of <i>gpl</i> serine recombinase.               |
| rimO_F       | ATCCCCCAAAGTAGGGTTCG            | Anneals at 9 bp to 28 bp of VanI <i>rimO</i> gene. Used to confirm integration site of JC1 with attP_R primer.                |
| rimO_R       | CACGGCCTGCATCACTTC              | Anneals at 9 bp to 28 bp of VanI <i>rimO</i> gene. Used to confirm integration site of JC1 with attP_F primer.                |
| XOA8_kpnI_F  | TAATGGTACCGAACAAAACGGCAAGAATCG  | Anneals upstream of K56-2 <i>wabO</i> gene. KpnI site underlined.                                                             |
| XOA8_xbaI_R  | TTTATCTAGAACCGTCATCTGGAAAGCTG   | Anneals downstream of K56-2 <i>wabO</i> gene. XbaI site underlined.                                                           |
| CCB1_kpnI_F  | TTTTGGTACCGCCGGGTTTATCTTGAAAAG  | Anneals upstream of K56-2 <i>waaC</i> gene. KpnI site underlined.                                                             |
| CCB1_xbaI_R  | TTTTTCTAGAGACGGGACTTCGATGATCTG  | Anneals downstream of K56-2 <i>waaC</i> gene. XbaI site underlined.                                                           |
| SAL1_kpnI_F  | TTATGGTACCGATGCACTCGTGATCGTGAC  | Anneals upstream of K56-2 <i>hldA</i> gene. KpnI site underlined.                                                             |
| SAL1_xbaI_R  | TTATTCTAGACTGGATCTCCGAAGAAAACG  | Anneals downstream of K56-2 <i>hldD</i> gene. XbaI site underlined.                                                           |
| kpnI_F_XOA7  | TAATGGTACCTACGTGGCGCACTGAAACAC  | Anneals upstream of K56-2 <i>waaL</i> gene. KpnI site underlined.                                                             |
| xbaI_R_XOA7  | TAAATCTAGACGATATGGAACAGCAATCGC  | Anneals downstream of K56-2 <i>waaL</i> gene. XbaI site underlined.                                                           |
| kpnI_F_RSFI9 | TAAAGGTACACAGGTTGTATCGGCGTCTC   | Anneals upstream of K56-2 <i>wbxE</i> gene. KpnI site underlined.                                                             |
| xbaI_R_RSFI9 | TAAATCTAGAACTGCGCCTGGTTGTAACAC  | Anneals downstream of K56-2 <i>wbxE</i> gene. XbaI site underlined.                                                           |
| kpnI_F_XOA15 | TAAAGGTACCCGATTCGCTAAAATGGCCC   | Anneals upstream of K56-2 <i>wabR</i> gene. KpnI site underlined.                                                             |
| xbaI_R_XOA15 | TAAATCTAGAAAGACGGTGTACTACCGCTTC | Anneals downstream of K56-2 <i>wabR</i> gene. XbaI site underlined.                                                           |
| kpnI_F_XOA17 | TAAAGGTACCATCGGATTCAGTCCAGCAG   | Anneals upstream of K56-2 <i>wabS</i> gene. KpnI site underlined.                                                             |
| xbaI_R_XOA17 | TAAATCTAGAAAGCCGTCTGACAGATTGCC  | Anneals downstream of K56-2 <i>wabS</i> gene. XbaI site underlined.                                                           |

## Supplementary Figure S1. RimO protein sequence of Van1 versus JC1 lysogen.

CLUSTAL multiple sequence alignment by MUSCLE (3.8)

```

lys      MSKKYSIGIVSLGCPKALVDSEQIITQLRAEGYEISGTYDGADLVVVNTCGFIDEAVQES
rimO     MSQSPKVG FVSLGCPKALVDSEQIITQLRAEGYEISGTYDGADLVVVNTCGFIDEAVQES
          **: .  .*:*****

lys      LDAIGEALTENGKVIIVTGCLGAKSSASGSNLIEEVHPKVLAVTGPHAVGEVMQAVHSHLP
rimO     LDAIGEALTENGKVIIVTGCLGAKSSASGSNLIEEVHPKVLAVTGPHAVGEVMQAVHSHLP
          *****

lys      KPHDPFVDLVPAAGIKLTPRHYAYLKISEGCNHRCTFCIIIPSMRGDLVSRPVAEVMLEAE
rimO     KPHDPFVDLVPAAGIKLTPRHYAYLKISEGCNHRCTFCIIIPSMRGDLVSRPVAEVMLEAE
          *****

lys      NLFKSGVKELLVISQDTSAYGVDVKYRTGFWNGKPIKTRMTDLVAALGELAAQYGAVVRL
rimO     NLFKSGVKELLVISQDTSAYGVDVKYRTGFWNGKPIKTRMTDLVAALGELAAQYGAVVRL
          *****

lys      HYVYPYPSVDEVIPLMAEGPFKGHVLPYLDVPFQHAHPEVLKRMKRPANAEKVLERVQKW
rimO     HYVYPYPSVDEVIPLMAEGPFKGHVLPYLDVPFQHAHPEVLKRMKRPANAEKVLERVQKW
          *****

lys      REICPDLTIRSTFIAGFPGETEEQFETLLDFVREAELDRVGCFAYS PVEGATANDLDGAL
rimO     REICPDLTIRSTFIAGFPGETEEQFETLLDFVREAELDRVGCFAYS PVEGATANDLDGAL
          *****

lys      PDEVREERRARFMEVAEEVSANRMQRKVGKTLKVLIDEVGEEGGIGRTAADAPEIDGVVY
rimO     PDEVREERRARFMEVAEEVSANRMQRKVGKTLKVLIDEVGEEGGIGRTAADAPEIDGVVY
          *****

lys      VEPAAKASKRYKVGDFVSVKITGADGHDWLGEV
rimO     VEPAAKASKRYKVGDFVSVKITGADGHDWLGEV
          *****

```
